# Supplementary material
Source: PubMed Central journal article supplement (PMC7439595)
Supplement: 925436_SupplementaryMaterial.pdf [file 925436_SupplementaryMaterial.pdf]

Supplemental Figure 1 Prisma Chart

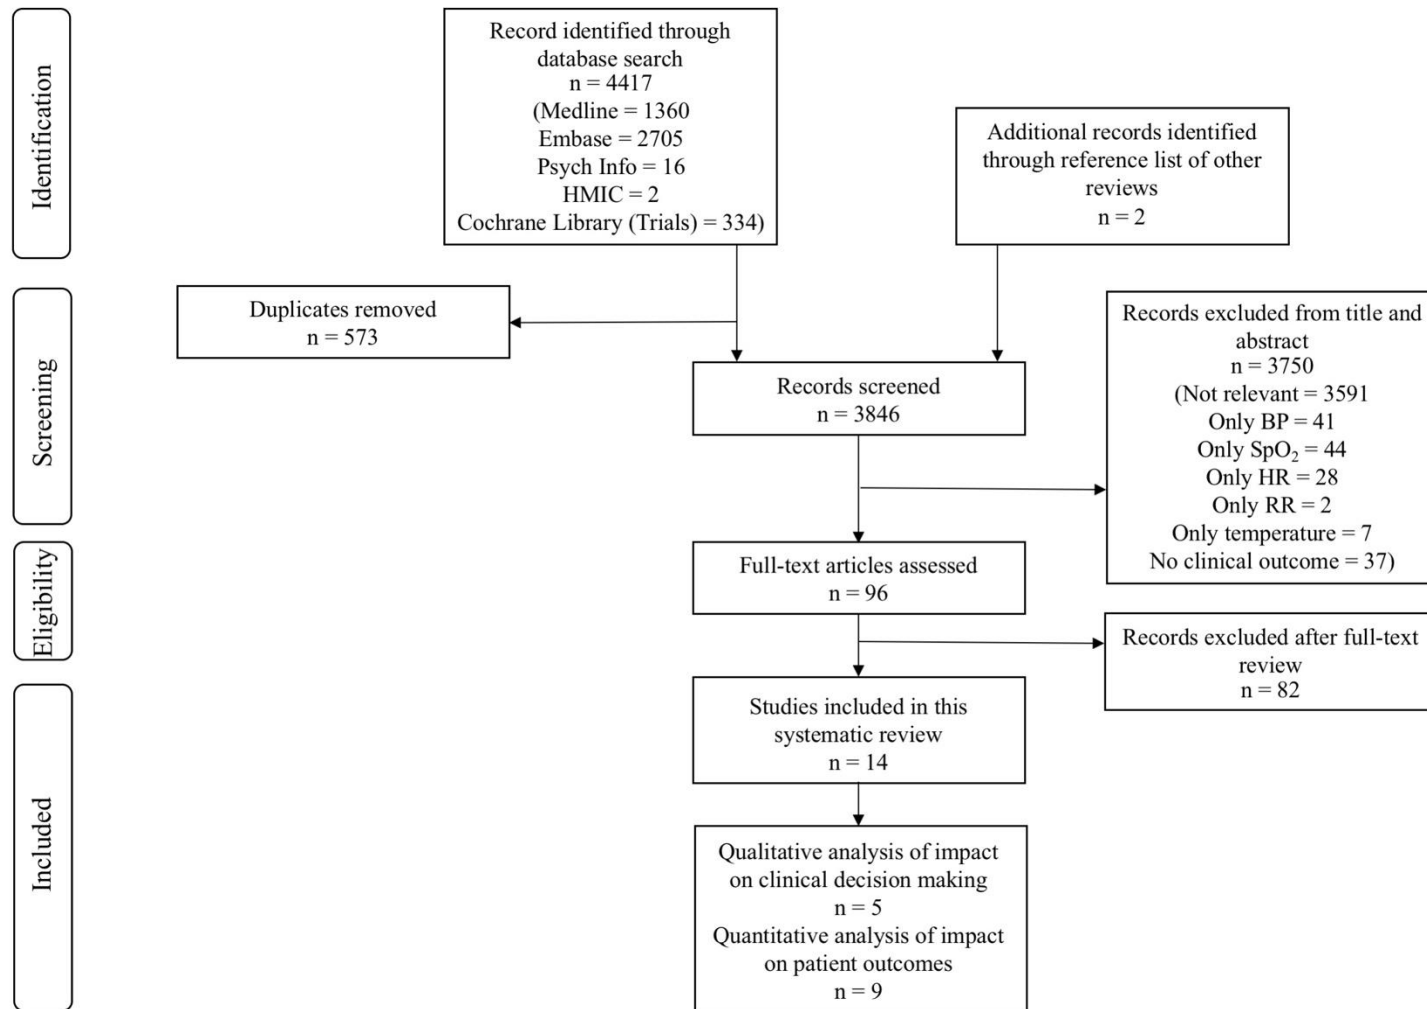

## Supplemental Table 1 Studies on Associations of Multi-Parameter CoNiM to Clinical Parameters (Group A)

Summary table of Group A studies.

| Study                  | n   | Type of trial                                                   | Device                                | Vital Signs Measured (Derived Parameters) | Patient Group                                             | Clinical Variable                                                                                      | Results                                                                                                                                                                                                                                                                                                                                         | Reference |
|------------------------|-----|-----------------------------------------------------------------|---------------------------------------|-------------------------------------------|-----------------------------------------------------------|--------------------------------------------------------------------------------------------------------|-------------------------------------------------------------------------------------------------------------------------------------------------------------------------------------------------------------------------------------------------------------------------------------------------------------------------------------------------|-----------|
| Kanaoka et al, 2012    | 25  | Prospective data collection and retrospective analysis          | TM-2425, A&D, Tokyo, Japan            | BP, HR                                    | Hospitalised hypertensive patients with CKD               | Renal function - Urine Albumin Excretion Rate (UACR) and eGFR                                          | UACR: 24-hour (p-value = 0.001), daytime (p-value = 0.009), and night-time (p-value < 0.001) ambulatory systolic BP, 24-hour (p-value = 0.007) and daytime (p-value = 0.016) HR variability. eGFR: 24-hour (p-value = 0.017) and night-time (p-value = 0.008) HR variability, and night-time HR (p-value = 0.038)                               | 39        |
| Zimlichman et al, 2012 | 113 | Prospective data collection and retrospective analysis          | Earlysense monitor                    | HR, RR                                    | Medical ward (Patients with acute respiratory condition)  | ICU transfer; intubation or mechanical ventilation; cardiac arrest in unit                             | ROC curve (combined HR & RR) - alerts: AUC = 0.75, p-value < 0.0001; trends: AUC = 0.93, p-value < 0.0026                                                                                                                                                                                                                                       | 40        |
| Nowak et al, 2014      | 510 | Prospective data collection and retrospective analysis, blinded | Nexfin                                | BP, HR (CO, CI, SV, SVI, SVR, SVRI)       | ED patients suspected acute heart failure, sepsis, stroke | Acute Heart Failure, Sepsis or Stroke diagnosis; 30-Day mortality of each patient group <sup>o</sup>   | SBP, DBP, Mean BP, HR, CO, CI, SVR, SVRI: all p-value < 0.0001; SVI: p-value = 0.0361; SV: p-value = 0.3737; 30-Day mortality SVI ROC curve: AHF: AUC=0.73, p-value < 0.01; sepsis: AUC=0.687, p-value < 0.01; stroke: AUC=0.741, p-value < 0.05                                                                                                | 25        |
| Hubner et al, 2015     | 226 | Prospective data collection and retrospective analysis          | IntelliVue Cableless Measurement Pods | RR, HR, SpO2, BP                          | Emergency department waiting room                         | Clinical symptom categories: dyspnoea, chest pain, hypertension, palpitation, collapse                 | SpO2: dyspnoea compared to chest pain p-value = 0.022; BP: hypertension compared to chest pain, palpitation and collapse all p-value < 0.001 while compared to dyspnoea p-value = 0.004; RR: dyspnoea compared to all other groups all p-value < 0.001; HR: palpitations compared to chest pain p-value < 0.001 and to collapse p-value = 0.024 | 38        |
| Nowak et al, 2016      | 127 | Prospective data collection and retrospective analysis, blinded | Nexfin                                | BP, HR (CI, SVRI)                         | ED patients with confirmed systemic infection             | Three different clusters of sepsis patients; 30-Day mortality, LOS, of each patient group <sup>o</sup> | CI and SVRI: all p-value < 0.0001; 30-Day mortality: p-value = 0.0311; LOS: p-value = 0.5801                                                                                                                                                                                                                                                    | 24        |

<sup>o</sup>In Nowak et al, 2014 and Nowak et al, 2016, clinical outcomes (i.e. 30-day mortality and hospital LOS) were only analysed within each patient cluster. Therefore they were excluded from Group B meta-analysis.

**Abbreviations** HR, heart rate; BP, blood pressure; RR, respiratory rate; SpO2, peripheral capillary oxygen saturation; CO, cardiac output; CI, cardiac index; SV, stroke volume; SVI, stroke volume index; SVR, systemic vascular resistance; SVRI, systemic vascular resistance index; CKD, chronic kidney disease; eGFR, estimated glomerular filtration rate; ICU, intensive care unit; ED, emergency department; LOS, length of stay.

## Supplemental Table 2 Studies on Clinical Outcome of Multi-Parameter CoNiM (Group B)

Summary table of Group B studies.

| Study                 | Type of trial                                                        | Total n | Device               | Vital Signs                                | Patient Group (n)                                        | Control <sup>§</sup> (n)                                  | In-hospital Mortality | Hospital LOS | ICU Transfer | RRT Activation | NOS | Reference |
|-----------------------|----------------------------------------------------------------------|---------|----------------------|--------------------------------------------|----------------------------------------------------------|-----------------------------------------------------------|-----------------------|--------------|--------------|----------------|-----|-----------|
| Sulter et al, 2003    | Prospective, parallel-grouped, randomised cohort study               | 54      | Marquette Eagle 4000 | HR, BP, SpO <sub>2</sub> , Temperature     | Stroke ward (27)                                         | Concurrent (27)                                           | ✓                     | ✓            |              |                | 8   | 42        |
| Cavallini et al, 2003 | Prospective, parallel-grouped, randomised cohort study               | 268     | Unknown              | HR, BP, RR, SpO <sub>2</sub> , Temperature | Stroke ward (134)                                        | Concurrent (134)                                          | ✓                     | ✓            |              |                | 8   | 43        |
| Kisner et al, 2008    | Retrospective cohort study                                           | 357     | Auricall             | HR, SpO <sub>2</sub>                       | Heart and vascular surgery ward postoperatively (119)    | Pre-intervention phase (238)                              |                       |              |              |                | 7   | 47        |
| Langhorne et al, 2010 | Prospective, parallel-grouped, randomised cohort study               | 32      | Welch Allyn          | HR, BP, SpO <sub>2</sub> , Temperature     | Stroke ward (16)                                         | Concurrent (16)                                           | ✓                     |              |              |                | 8   | 44        |
| Brown et al, 2014     | Prospective, parallel-grouped, randomised cohort study               | 7643    | EarlySense system    | HR, RR                                     | Medical-surgical ward (2361)                             | Pre-intervention phase and concurrent <sup>†</sup> (5282) |                       |              | ✓            | ✓              | 9   | 45        |
| Pearl et al, 2016     | Prospective cohort study                                             | 231     | Phillips MP5SC       | Multiple vital signs*                      | General hospital wards (80)                              | Pre-intervention phase (151)                              | ✓                     |              |              |                | 8   | 46        |
| Weller et al, 2017    | Prospective cohort study                                             | 2937    | Sotera VisiMobile    | HR, BP, RR, SpO <sub>2</sub>               | Neuro/Neuro-Surgical ward, general hospital wards (1069) | Pre-intervention phase and concurrent <sup>†</sup> (2887) | ✓                     | ✓            | ✓            | ✓              | 9   | 26        |
| Downey et al, 2018    | Prospective, parallel-grouped, cluster-randomised cohort study       | 350     | Sensium Vitals       | HR, RR, Temperature                        | Elective general surgery wards (140)                     | Concurrent (86)                                           |                       | ✓            |              |                | 8   | 41        |
| Verrillo et al, 2018  | Prospective with retrospective review of control group, cohort study | 849     | Sotera VisiMobile    | HR, BP, RR, SpO <sub>2</sub> , Temperature | Orthopedic and trauma general care ward (422)            | Pre-intervention phase (427)                              | ✓                     |              | ✓            | ✓              | 8   | 48        |

\*Did not specify vital signs monitored.

<sup>§</sup>Concurrent implies same period but in a different ward while pre-intervention phase implies different period but in the same ward as intervention ward.

<sup>†</sup>Also includes a control group during pre-intervention phase but in the ward used by the concurrent control group; therefore in Brown et al, 2014, only 1535 control patients from the intervention ward but during pre-intervention phase were included in this meta-analysis; likewise only 889 control patients were included from Weller et al, 2017.

**Abbreviations** HR, heart rate; BP, blood pressure; RR, respiratory rate; SpO<sub>2</sub>, peripheral capillary oxygen saturation.





Supplemental Figure 2.2

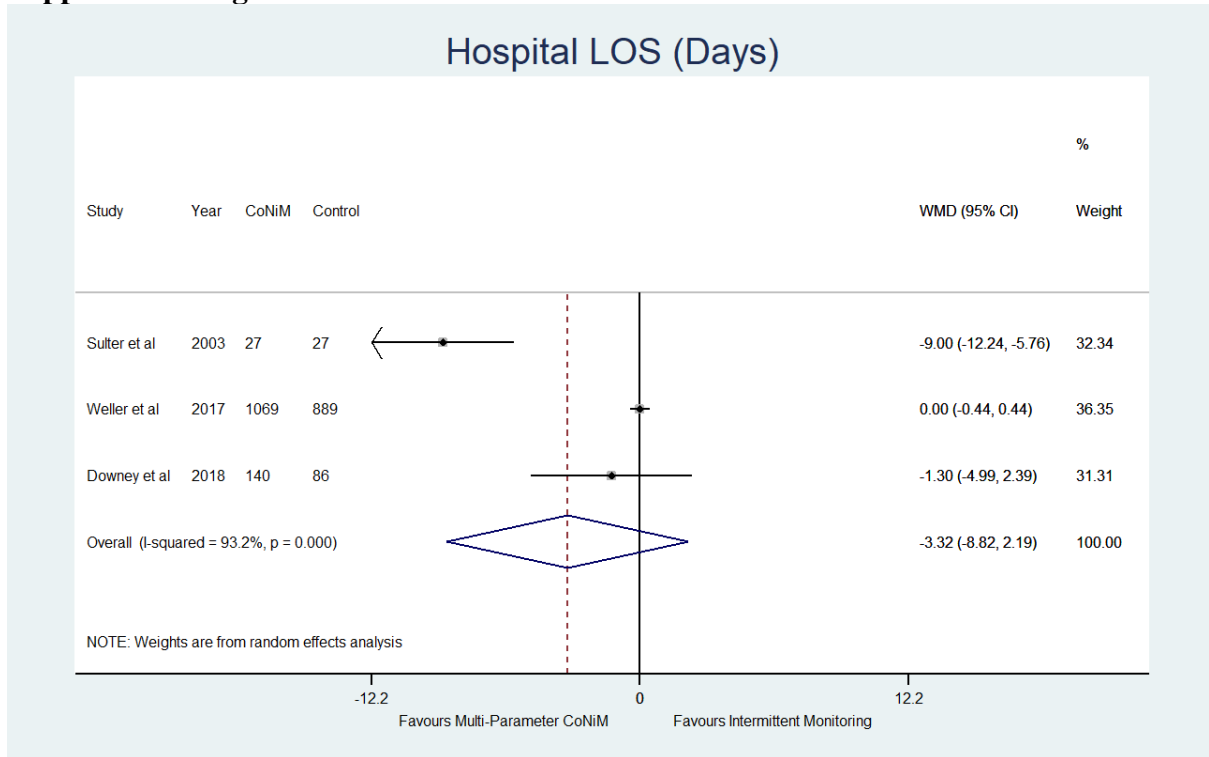

Forest plot of weighted mean difference (WMD) in hospital LOS.

**Supplemental Figure 2.3**

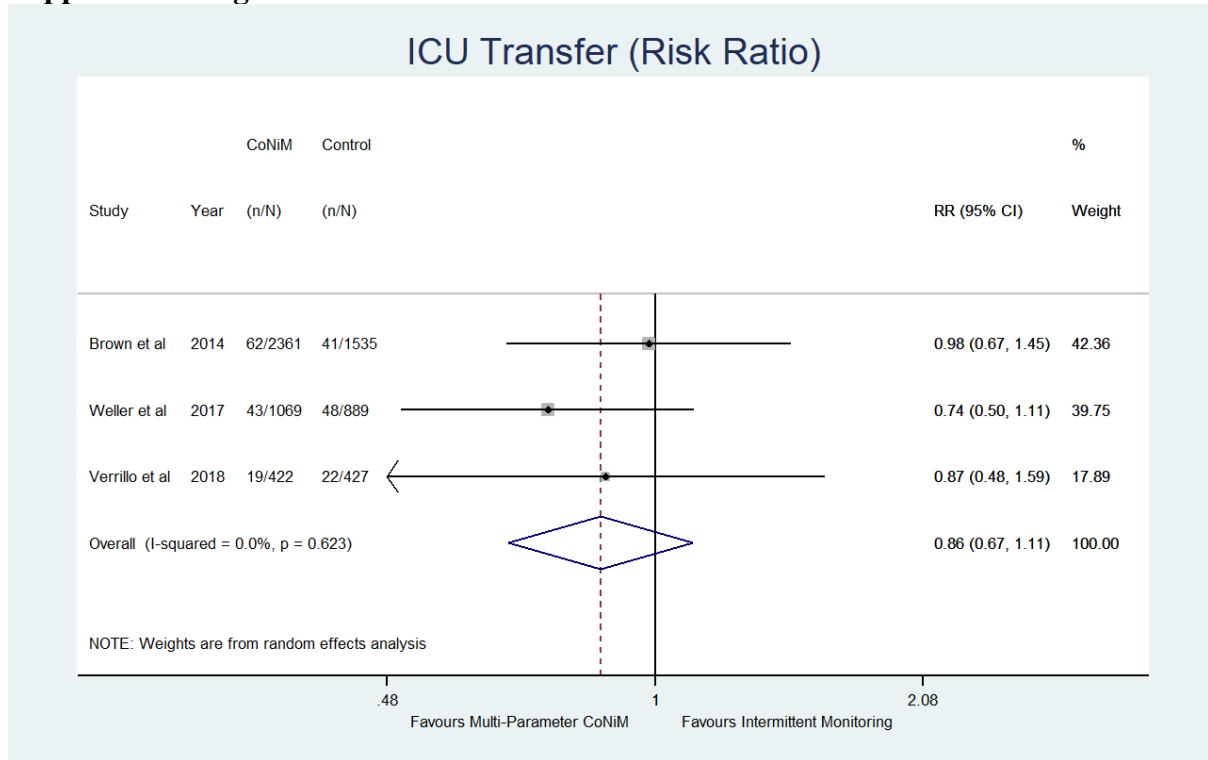

Forest plot of ICU transfer risk ratio. n, positive cases; N, sample size.

Supplemental Figure 2.4

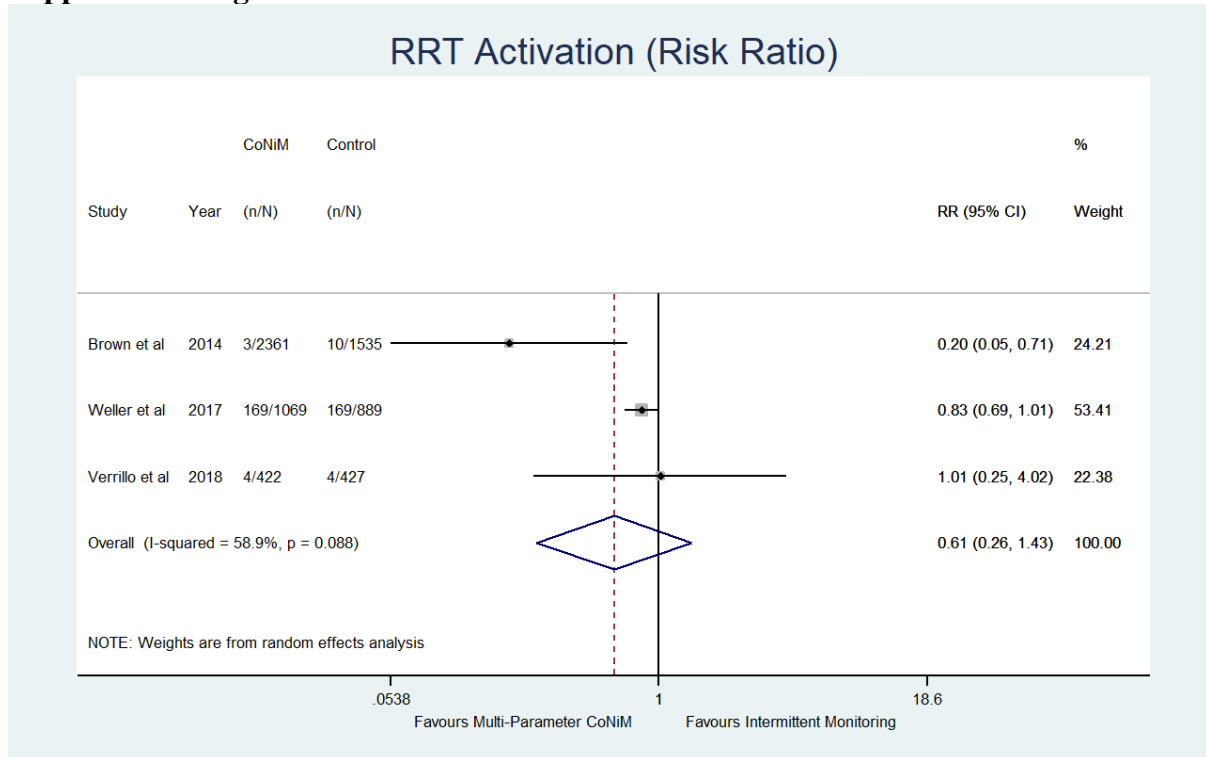

Forest plot of RRT activation risk ratio. n, positive cases; N, sample size.



## Appendix A (Search Strategy)

Search was performed on 18<sup>th</sup> June 2019.

|                                                                                                                                                                                                                                                                                                                                                                                                                                                                                                   |
|---------------------------------------------------------------------------------------------------------------------------------------------------------------------------------------------------------------------------------------------------------------------------------------------------------------------------------------------------------------------------------------------------------------------------------------------------------------------------------------------------|
| <b>Concept: Continuous monitoring</b>                                                                                                                                                                                                                                                                                                                                                                                                                                                             |
| Continuous monitor*                                                                                                                                                                                                                                                                                                                                                                                                                                                                               |
| Wear* adj3 Sensor?                                                                                                                                                                                                                                                                                                                                                                                                                                                                                |
| Wearable system?                                                                                                                                                                                                                                                                                                                                                                                                                                                                                  |
| Wearable technolog*                                                                                                                                                                                                                                                                                                                                                                                                                                                                               |
| Remote sensor?                                                                                                                                                                                                                                                                                                                                                                                                                                                                                    |
| Patient* adj3 sensor?                                                                                                                                                                                                                                                                                                                                                                                                                                                                             |
| Mobile sensor?                                                                                                                                                                                                                                                                                                                                                                                                                                                                                    |
| Ambulatory sensor?                                                                                                                                                                                                                                                                                                                                                                                                                                                                                |
| Wear* adj3 Detector*                                                                                                                                                                                                                                                                                                                                                                                                                                                                              |
| Remote detector*                                                                                                                                                                                                                                                                                                                                                                                                                                                                                  |
| Patient* adj3 Detector*                                                                                                                                                                                                                                                                                                                                                                                                                                                                           |
| Mobile detector*                                                                                                                                                                                                                                                                                                                                                                                                                                                                                  |
| Ambulatory Detector*                                                                                                                                                                                                                                                                                                                                                                                                                                                                              |
| Telemetr*                                                                                                                                                                                                                                                                                                                                                                                                                                                                                         |
| Chest belt*                                                                                                                                                                                                                                                                                                                                                                                                                                                                                       |
| Abdominal belt*                                                                                                                                                                                                                                                                                                                                                                                                                                                                                   |
| Bend Sensor*                                                                                                                                                                                                                                                                                                                                                                                                                                                                                      |
| Oximetr*                                                                                                                                                                                                                                                                                                                                                                                                                                                                                          |
| Thermometer*                                                                                                                                                                                                                                                                                                                                                                                                                                                                                      |
| Thermometre*                                                                                                                                                                                                                                                                                                                                                                                                                                                                                      |
| [Embase MeSH] Monitor; electronic device; general medical device; cardiovascular monitoring device; patient monitor; personal monitor; blood pressure monitor; cardiovascular monitoring device; non invasive blood pressure monitor; blood pressure alarm; telemetry; exp remote sensing; temperature measurement; exp body temperature measurement; exp body temperature monitoring; patient monitoring; ambulatory monitoring; apnea monitoring; cardiovascular monitoring device; cardiometer |
| [Medline MeSH] Monitoring, physiologic; hemodynamic monitoring; monitoring, ambulatory; blood pressure monitoring, ambulatory; telemetry; remote sensing technology                                                                                                                                                                                                                                                                                                                               |
| [HMIC MeSH] Patient monitoring equipment; patient monitoring; medical telemetering equipment; telemetry                                                                                                                                                                                                                                                                                                                                                                                           |
| [PsychINFO MeSH] Monitoring; telemetry                                                                                                                                                                                                                                                                                                                                                                                                                                                            |
| [Cochrane MeSH, explode all trees] Wearable electronic devices, telemetry, oximetry, thermometers                                                                                                                                                                                                                                                                                                                                                                                                 |
| <b>Concept: Hospital</b>                                                                                                                                                                                                                                                                                                                                                                                                                                                                          |
| Hospital*                                                                                                                                                                                                                                                                                                                                                                                                                                                                                         |
| Ward*                                                                                                                                                                                                                                                                                                                                                                                                                                                                                             |
| Inpatient*                                                                                                                                                                                                                                                                                                                                                                                                                                                                                        |
| [Embase MeSH] Hospital; community hospital; general hospital; geriatric hospital; high volume hospital; private hospital; public hospital; teaching hospital; university hospital                                                                                                                                                                                                                                                                                                                 |
| [Medline MeSH] Academic medical centers; hospitals, teaching; hospitals, university; hospital units; hospitals; hospitals, community; hospitals, general; hospitals, group practice; hospitals, high-volume; hospitals, low-volume; hospitals, private; hospitals, public; hospitals, county; hospitals, district; hospitals, federal; hospitals, military; hospitals, veterans; hospitals, municipal; hospitals, state; hospitals, rural; hospitals,                                             |

|                                                                                                                                                                                                                                                                                                                                                                                                                                                                                                                                                                                     |
|-------------------------------------------------------------------------------------------------------------------------------------------------------------------------------------------------------------------------------------------------------------------------------------------------------------------------------------------------------------------------------------------------------------------------------------------------------------------------------------------------------------------------------------------------------------------------------------|
| satellite; hospitals, chronic disease; hospitals, urban; secondary care centers; tertiary care centers                                                                                                                                                                                                                                                                                                                                                                                                                                                                              |
| [HMIC MeSH] Hospitals; civil defence hospitals; community hospitals; day hospitals; district general hospitals; emergency hospitals; general hospitals; independent hospitals; large hospitals; local authority hospitals; long stay hospitals; medium sized hospitals; medium stay hospitals; military hospitals; modern hospitals; national hospitals; new hospitals; night hospitals; non teaching hospitals; nucleus hospitals; patient focussed hospitals; regional hospitals; rural hospitals; satellite hospitals; specialist hospitals; teaching hospitals; whole hospitals |
| [PsychINFO MeSH] Hospitals; hospitalized patients                                                                                                                                                                                                                                                                                                                                                                                                                                                                                                                                   |
| [Cochrane MeSH, explode all trees] Inpatients, Patients' rooms                                                                                                                                                                                                                                                                                                                                                                                                                                                                                                                      |
| <b>Concept: Vital signs</b>                                                                                                                                                                                                                                                                                                                                                                                                                                                                                                                                                         |
| Vital sign*                                                                                                                                                                                                                                                                                                                                                                                                                                                                                                                                                                         |
| Early warning system*                                                                                                                                                                                                                                                                                                                                                                                                                                                                                                                                                               |
| Early warning scor*                                                                                                                                                                                                                                                                                                                                                                                                                                                                                                                                                                 |
| MEWS                                                                                                                                                                                                                                                                                                                                                                                                                                                                                                                                                                                |
| EWS                                                                                                                                                                                                                                                                                                                                                                                                                                                                                                                                                                                 |
| National early warning score                                                                                                                                                                                                                                                                                                                                                                                                                                                                                                                                                        |
| EWSS                                                                                                                                                                                                                                                                                                                                                                                                                                                                                                                                                                                |
| Track and trigger system*                                                                                                                                                                                                                                                                                                                                                                                                                                                                                                                                                           |
| TTS                                                                                                                                                                                                                                                                                                                                                                                                                                                                                                                                                                                 |
| Risk assessment tool*                                                                                                                                                                                                                                                                                                                                                                                                                                                                                                                                                               |
| Physiolog* adj4 state*                                                                                                                                                                                                                                                                                                                                                                                                                                                                                                                                                              |
| Physiolog* adj4 information                                                                                                                                                                                                                                                                                                                                                                                                                                                                                                                                                         |
| Physiolog* adj4 marker*                                                                                                                                                                                                                                                                                                                                                                                                                                                                                                                                                             |
| Physiolog* adj4 parameter*                                                                                                                                                                                                                                                                                                                                                                                                                                                                                                                                                          |
| Physiolog* adj4 parametre*                                                                                                                                                                                                                                                                                                                                                                                                                                                                                                                                                          |
| Oxygen sat*                                                                                                                                                                                                                                                                                                                                                                                                                                                                                                                                                                         |
| Blood pressure*                                                                                                                                                                                                                                                                                                                                                                                                                                                                                                                                                                     |
| Heart adj4 rate*                                                                                                                                                                                                                                                                                                                                                                                                                                                                                                                                                                    |
| Heart adj4 beat*                                                                                                                                                                                                                                                                                                                                                                                                                                                                                                                                                                    |
| Pulse                                                                                                                                                                                                                                                                                                                                                                                                                                                                                                                                                                               |
| H?emodynamic*                                                                                                                                                                                                                                                                                                                                                                                                                                                                                                                                                                       |
| Bod* adj4 temperature                                                                                                                                                                                                                                                                                                                                                                                                                                                                                                                                                               |
| Skin adj4 temperature                                                                                                                                                                                                                                                                                                                                                                                                                                                                                                                                                               |
| Respirat* adj4 rate*                                                                                                                                                                                                                                                                                                                                                                                                                                                                                                                                                                |
| Rapid Response                                                                                                                                                                                                                                                                                                                                                                                                                                                                                                                                                                      |
| [Embase MeSH] Vital sign; hemodynamic parameters; blood pressure; diastolic blood pressure; pulse pressure; systolic blood pressure; body temperature; axilla temperature; basal body temperature; mouth temperature; tympanic temperature; "heart rate and rhythm"; heart rhythm; pulse rate; pulse wave; sinus rhythm; heart rate; heart rate variability; resting heart rate, breathing rate                                                                                                                                                                                     |
| [Medline MeSH] Vital signs; blood pressure; body temperature; heart rate; respiratory rate; early diagnosis; Patient Safety; Clinical Alarms                                                                                                                                                                                                                                                                                                                                                                                                                                        |
| [HMIC MeSH] Blood pressure; blood pressure measurement; body temperature; heart rate; haemodynamics; respirometers; early diagnosis                                                                                                                                                                                                                                                                                                                                                                                                                                                 |
| [PsychINFO MeSH] Blood pressure; body temperature; skin temperature; heart rate; respiration; early intervention                                                                                                                                                                                                                                                                                                                                                                                                                                                                    |

|                                                                                                                                                                                                                                                                   |
|-------------------------------------------------------------------------------------------------------------------------------------------------------------------------------------------------------------------------------------------------------------------|
| [Cochrane MeSH, explode all trees] Vital Signs, Hemodynamic monitoring, blood pressure monitors, body temperature, heart rate, respiratory rate                                                                                                                   |
| <b>Concept: Adult</b>                                                                                                                                                                                                                                             |
| Adult*                                                                                                                                                                                                                                                            |
| [Embase MeSH] Adult                                                                                                                                                                                                                                               |
| [Medline MeSH] exp Adult                                                                                                                                                                                                                                          |
| [HMIC MeSH] Adults; middle aged people; older people; young adults; adult physiology                                                                                                                                                                              |
| [PsychINFO MeSH] -                                                                                                                                                                                                                                                |
| [Cochrane MeSH, explode all trees] Adult                                                                                                                                                                                                                          |
| <b>Concept: Patient outcomes</b>                                                                                                                                                                                                                                  |
| Mortality                                                                                                                                                                                                                                                         |
| Deteriorat*                                                                                                                                                                                                                                                       |
| Discharge*                                                                                                                                                                                                                                                        |
| Recover*                                                                                                                                                                                                                                                          |
| Recuperat*                                                                                                                                                                                                                                                        |
| diagnos* adj3 accurac*                                                                                                                                                                                                                                            |
| early diagnosis                                                                                                                                                                                                                                                   |
| transfer* adj4 ITU                                                                                                                                                                                                                                                |
| transfer* adj4 ICU                                                                                                                                                                                                                                                |
| transfer* adj4 intensive care unit?                                                                                                                                                                                                                               |
| transfer* adj4 intensive treatment unit?                                                                                                                                                                                                                          |
| transfer* adj4 intensive therapy unit?                                                                                                                                                                                                                            |
| move* adj4 ITU                                                                                                                                                                                                                                                    |
| move* adj4 ICU                                                                                                                                                                                                                                                    |
| move* adj4 intensive care unit?                                                                                                                                                                                                                                   |
| move* adj4 intensive therapy unit?                                                                                                                                                                                                                                |
| move* adj4 intensive treatment unit?                                                                                                                                                                                                                              |
| morbidity                                                                                                                                                                                                                                                         |
| sepsis                                                                                                                                                                                                                                                            |
| septic                                                                                                                                                                                                                                                            |
| cardiac arrest                                                                                                                                                                                                                                                    |
| respiratory distress                                                                                                                                                                                                                                              |
| Bacter?emia                                                                                                                                                                                                                                                       |
| Patient outcome                                                                                                                                                                                                                                                   |
| [Embase MeSH] exp treatment outcome; exp adverse outcome; exp outcome assessment; exp outcome variable; exp Glasgow outcome scale; exp patient-reported outcome; exp general condition deterioration; exp morbidity; exp sepsis; exp septic shock; exp bacteremia |
| [Medline MeSH] exp disease-free survival; exp treatment outcome; exp "Outcome Assessment (Health Care)"; exp Glasgow Coma Scale; exp CLINICAL DETERIORATION; exp MORBIDITY; exp HOSPITAL MORTALITY; exp MORTALITY; exp SEPSIS; exp Shock, Septic; exp BACTEREMIA  |
| [HMIC MeSH] exp Patient outcome; outcomes; exp health outcomes; exp outcome measurement; exp outcome measures; exp performance; exp Deterioration; exp Morbidity; exp Mortality; exp Sepsis                                                                       |
| [PsychINFO MeSH] exp Treatment Outcomes; exp MORBIDITY; exp "death and dying"; exp Inflammation                                                                                                                                                                   |

[Cochrane MeSH, explode all trees] Adverse outcome pathways, fatal outcome, patient outcome assessment, critical care outcomes, sepsis, clinical deterioration, heart arrest, respiratory distress syndrome (adult)
